# Supplementary material
Source: Springer Nature journal article supplement (https://www.springermedizin.de/resource/supplementary/12889_2012_4676_MOESM2_ESM.pdf/9493376)

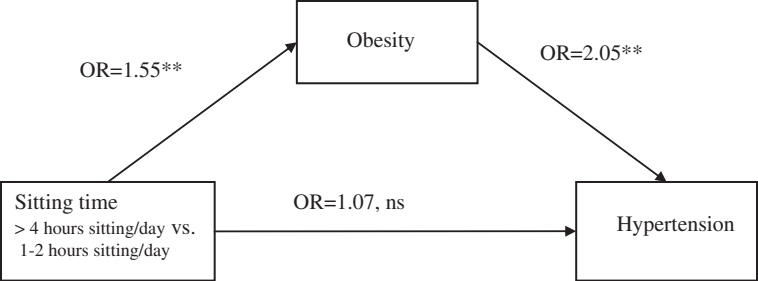

Sobel= 6.42,  $p < .01$

Supplement: MOESM2 [file 9493376]
